# Supplementary material for: Clinical impact of neutropenia and febrile neutropenia in metastatic colorectal cancer patients treated with FOLFOXIRI/bevacizumab: a pooled analysis of TRIBE and TRIBE2 studies by GONO
Source: PubMed Central journal article supplement (PMC8551530; doi:10.1016/j.esmoop.2021.100293), 2021-10-22
Supplement: mmc2.pdf [file mmc2.pdf]

A

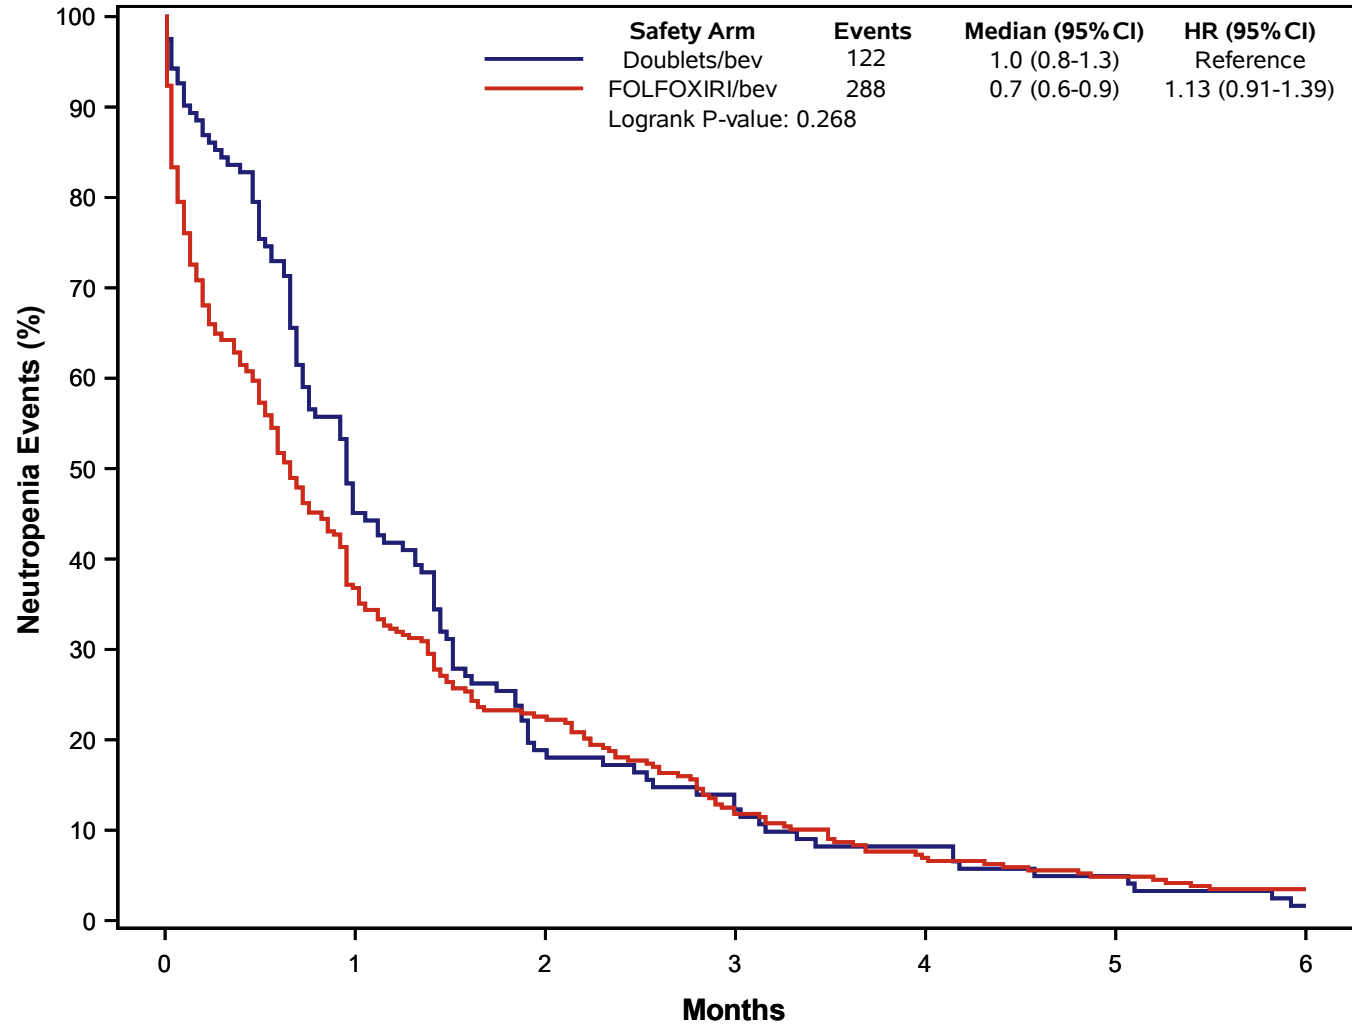

| No. at Risk   | 0   | 1   | 2  | 3  | 4  | 5  | 6  |
|---------------|-----|-----|----|----|----|----|----|
| Doublets/bev  | 122 | 55  | 23 | 15 | 10 | 6  | 2  |
| FOLFOXIRI/bev | 288 | 106 | 65 | 34 | 20 | 14 | 10 |

B

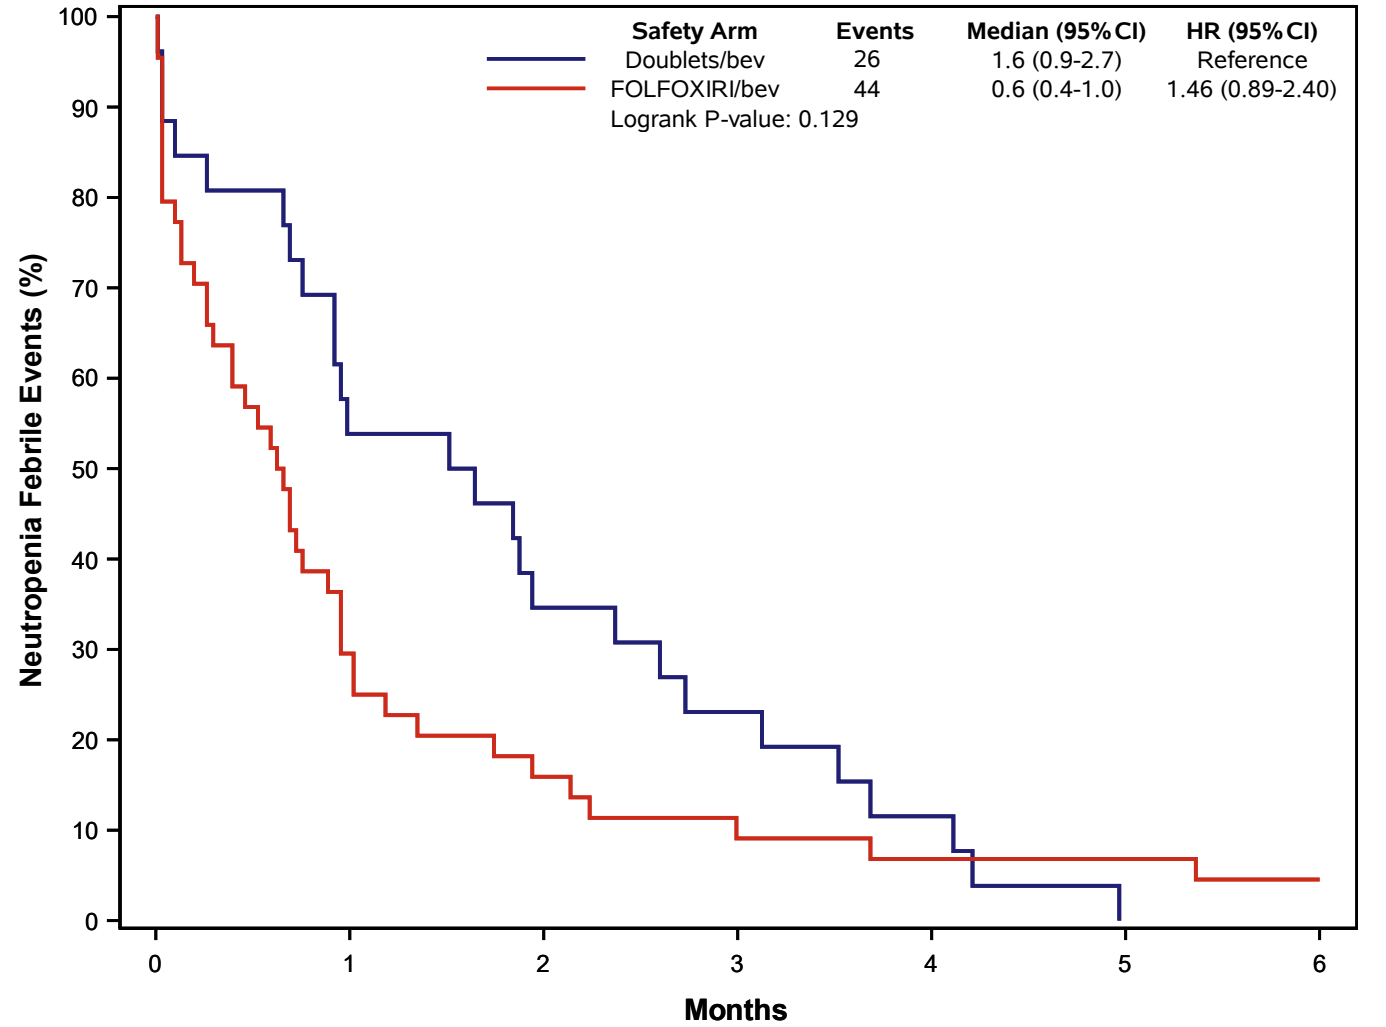

| No. at Risk   | 0  | 1  | 2 | 3 | 4 | 5 | 6 |
|---------------|----|----|---|---|---|---|---|
| Doublets/bev  | 26 | 14 | 9 | 6 | 3 | 0 | 0 |
| FOLFOXIRI/bev | 44 | 13 | 7 | 4 | 3 | 3 | 2 |
