# Supplementary material for: Clinical impact of neutropenia and febrile neutropenia in metastatic colorectal cancer patients treated with FOLFOXIRI/bevacizumab: a pooled analysis of TRIBE and TRIBE2 studies by GONO
Source: PubMed Central journal article supplement (PMC8551530; doi:10.1016/j.esmoop.2021.100293), 2021-10-22

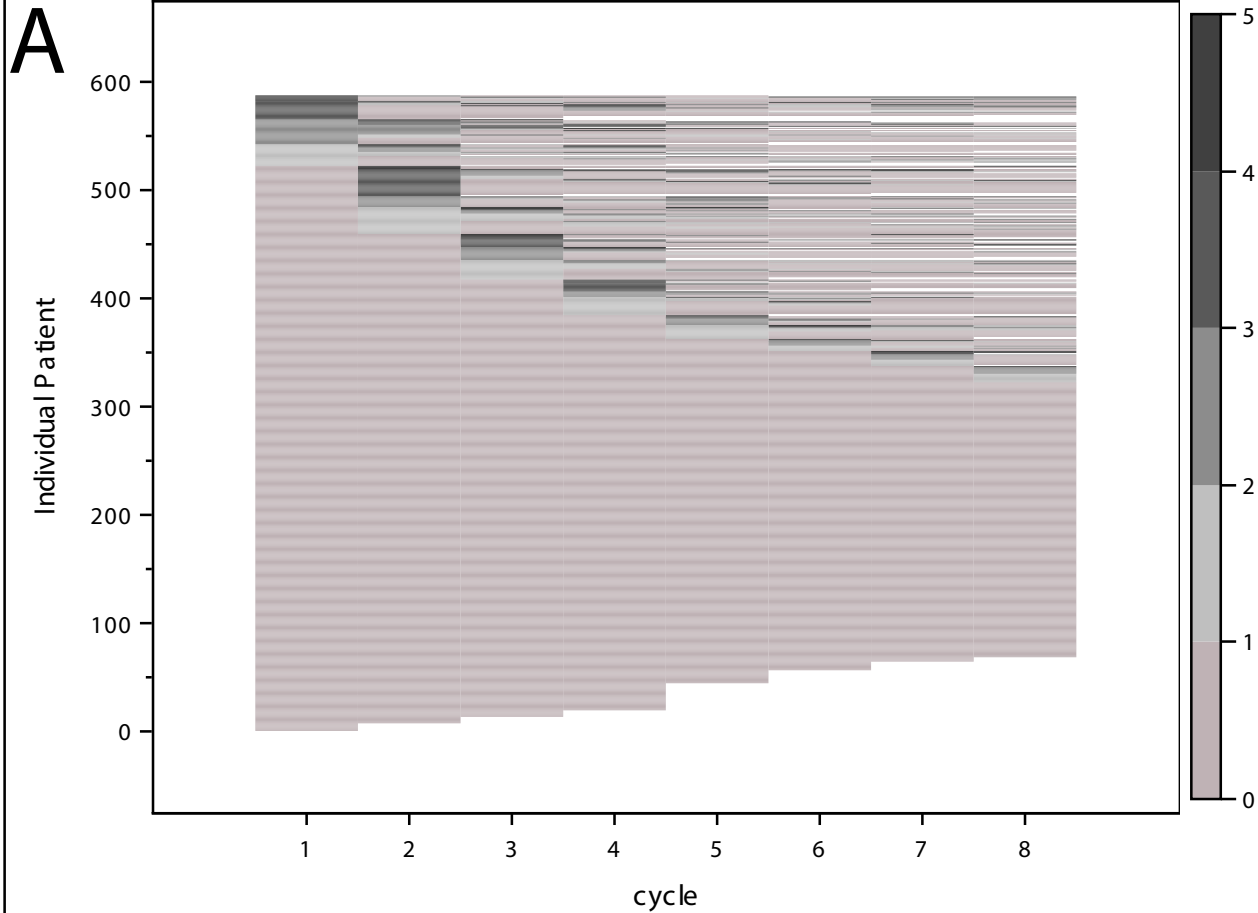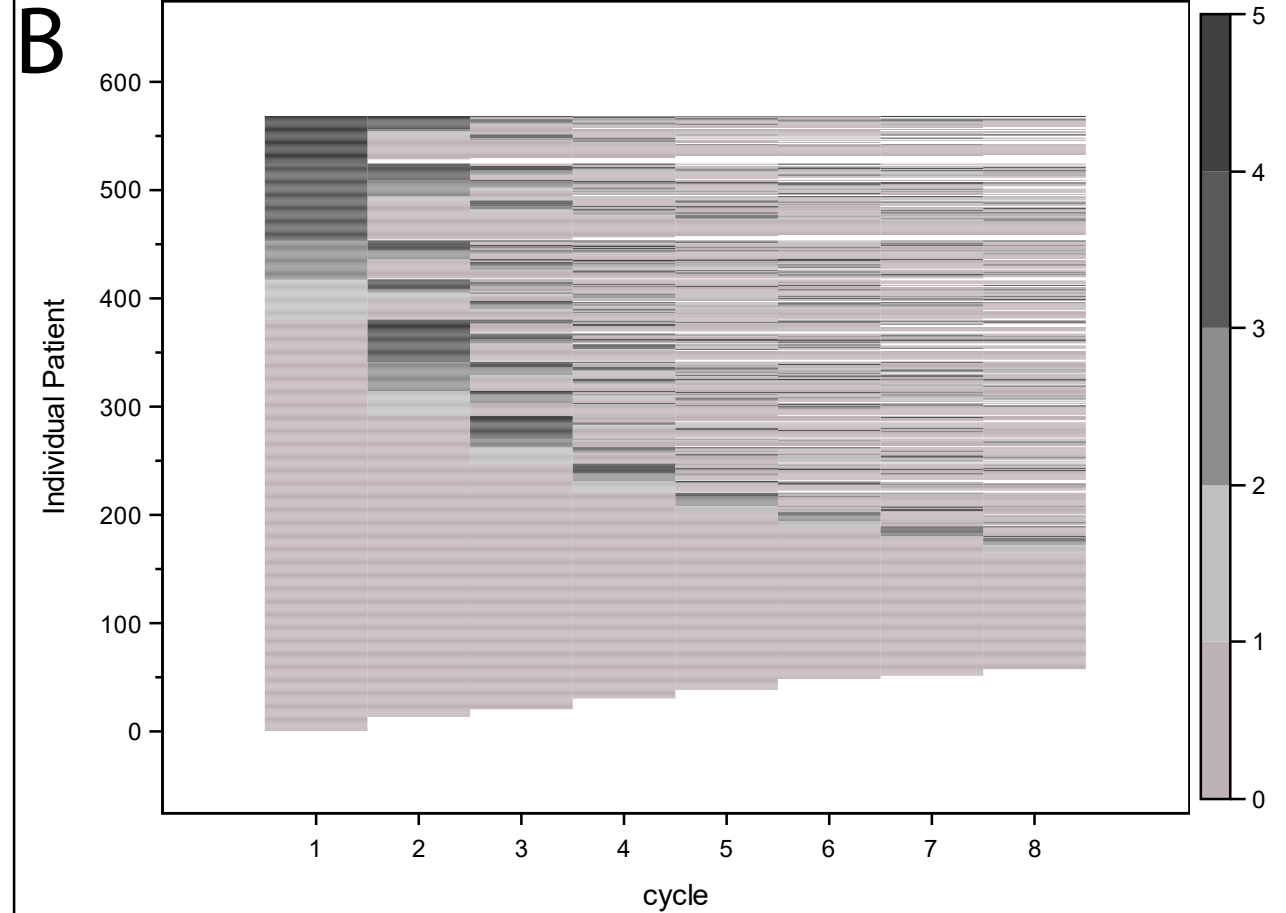

Supplement: mmc3.pdf [file mmc3.pdf]
