# Supplementary material for: Clinical impact of neutropenia and febrile neutropenia in metastatic colorectal cancer patients treated with FOLFOXIRI/bevacizumab: a pooled analysis of TRIBE and TRIBE2 studies by GONO
Source: PubMed Central journal article supplement (PMC8551530; doi:10.1016/j.esmoop.2021.100293), 2021-10-22
Supplement: mmc4.pdf [file mmc4.pdf]

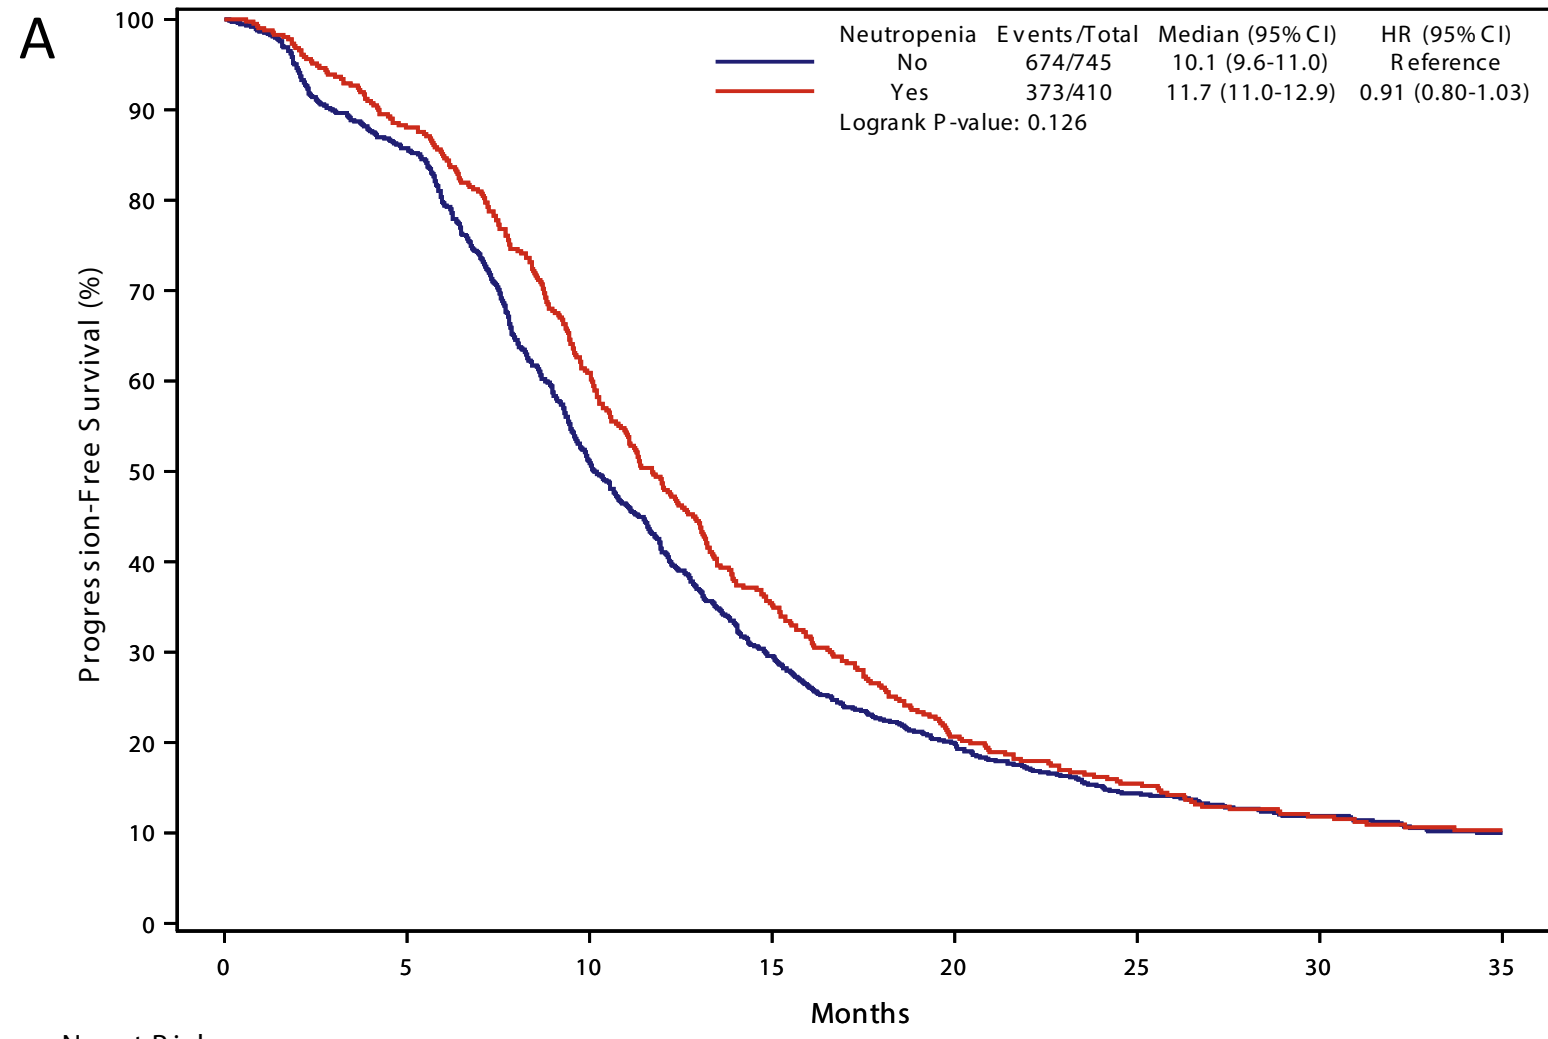

No. at Risk

|     |     |     |     |     |     |     |    |    |
|-----|-----|-----|-----|-----|-----|-----|----|----|
| No  | 745 | 635 | 379 | 219 | 147 | 105 | 73 | 51 |
| Yes | 410 | 361 | 249 | 144 | 84  | 62  | 43 | 30 |

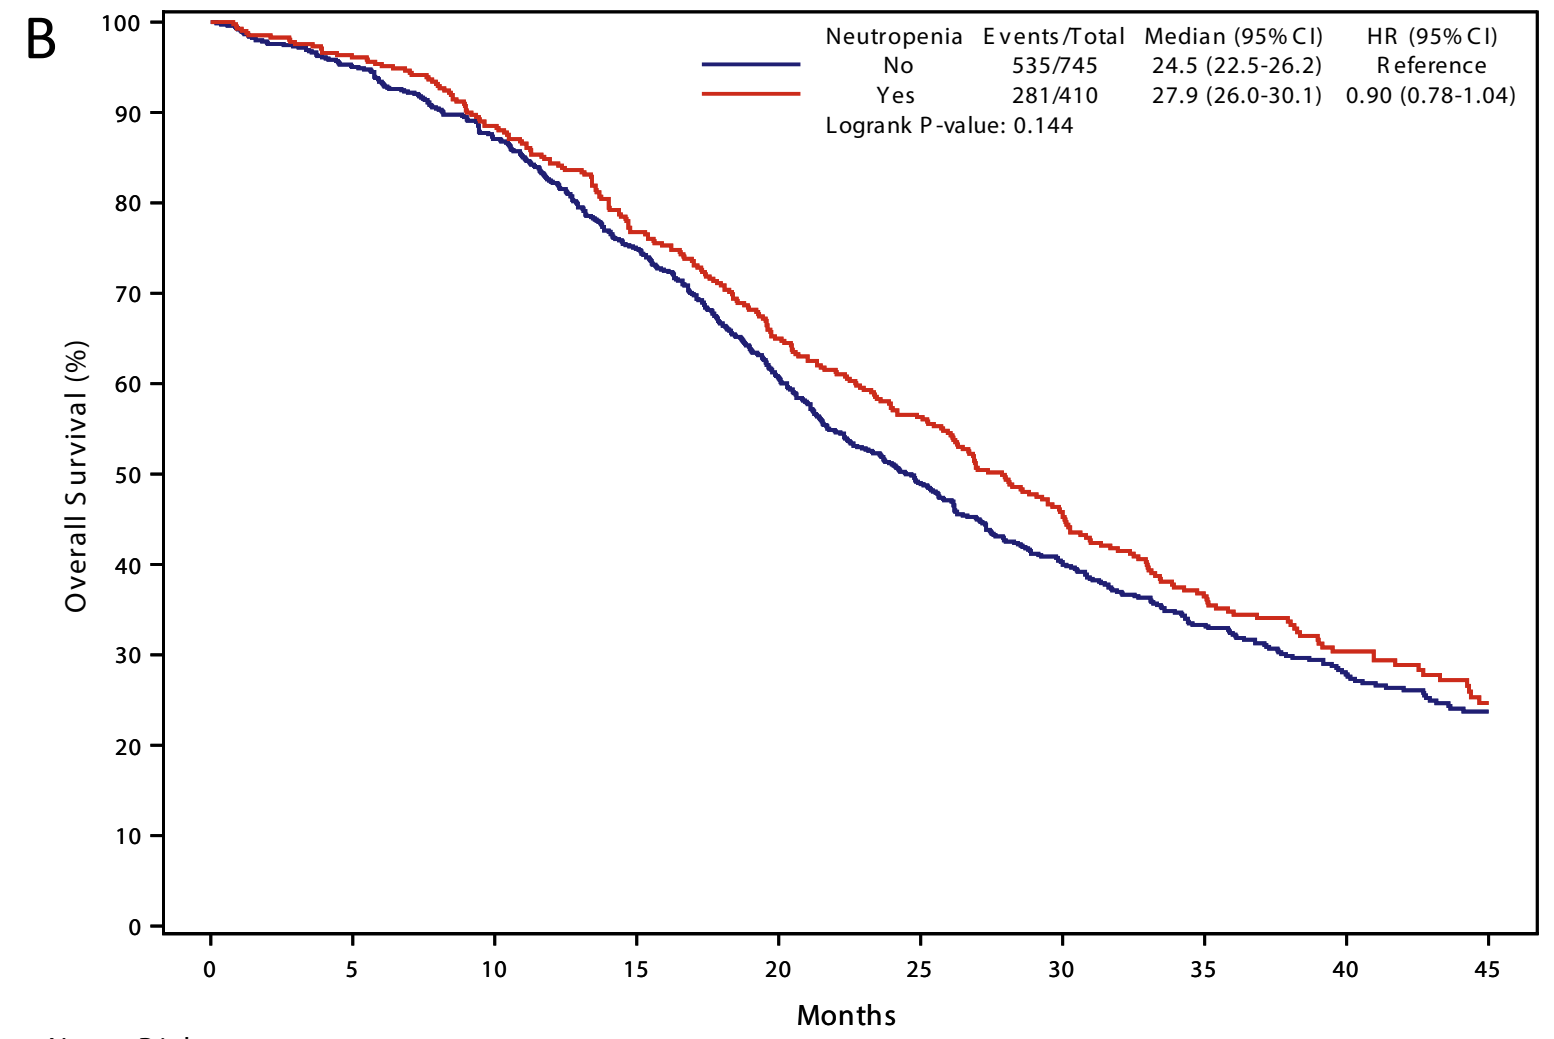

No. at Risk

|     |     |     |     |     |     |     |     |     |     |    |
|-----|-----|-----|-----|-----|-----|-----|-----|-----|-----|----|
| No  | 745 | 704 | 645 | 555 | 448 | 359 | 262 | 191 | 115 | 69 |
| Yes | 410 | 394 | 362 | 313 | 264 | 224 | 163 | 110 | 66  | 38 |

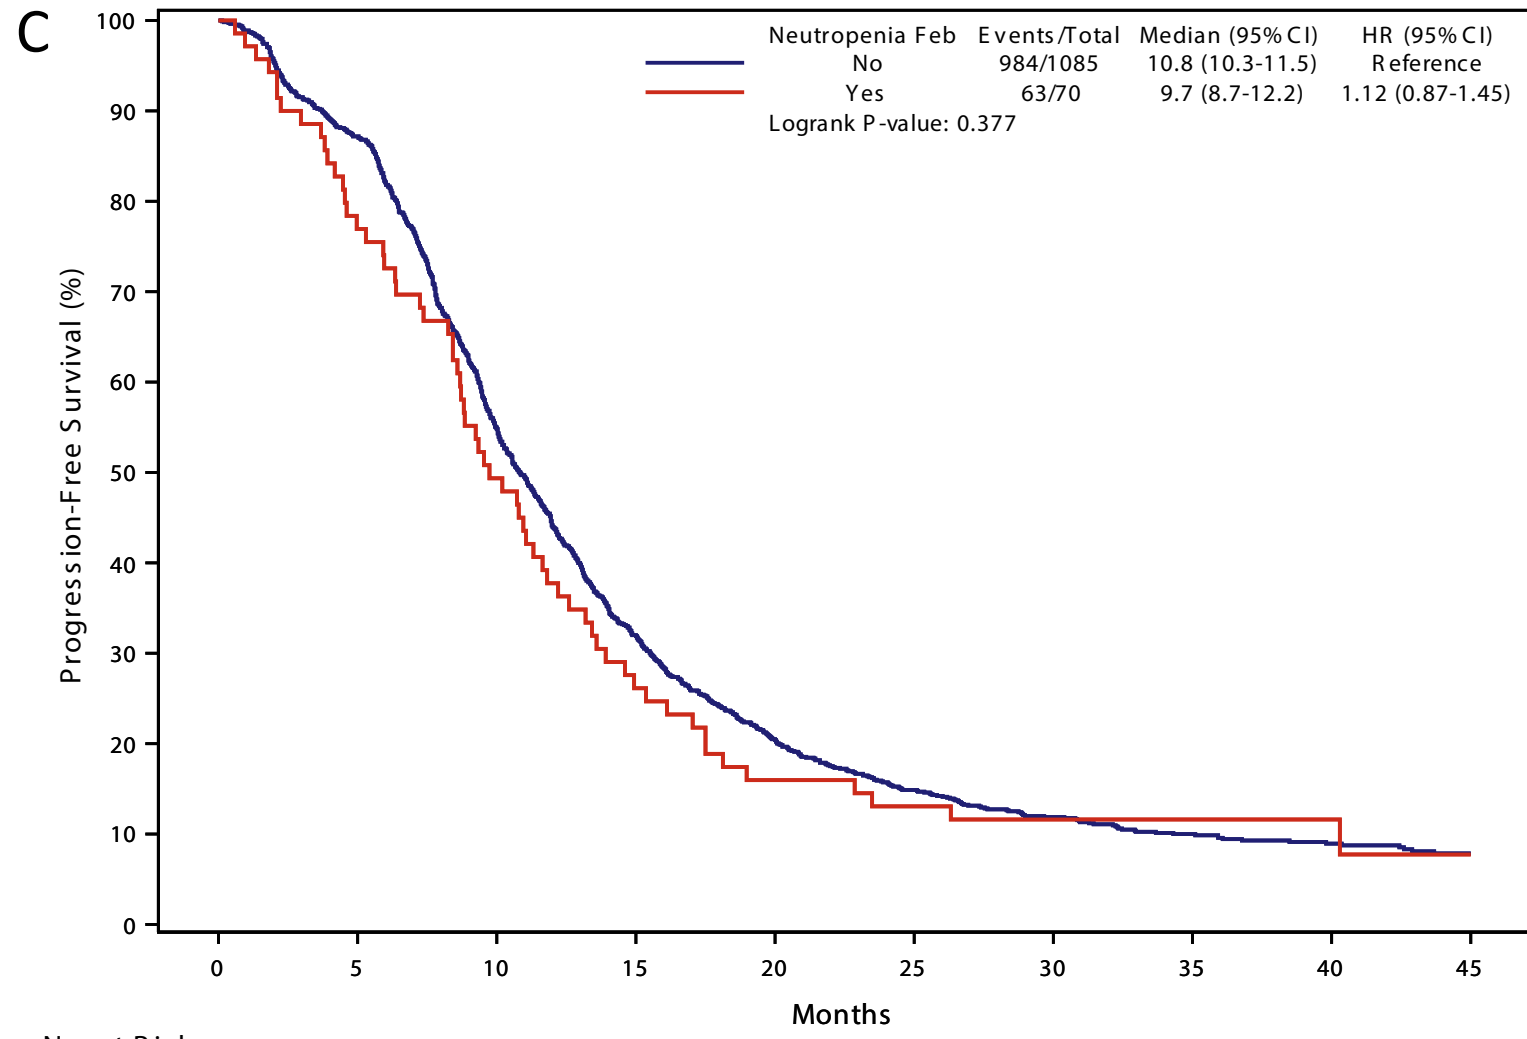

No. at Risk

|     |      |     |     |     |     |     |     |    |    |    |
|-----|------|-----|-----|-----|-----|-----|-----|----|----|----|
| No  | 1085 | 943 | 594 | 345 | 220 | 158 | 108 | 75 | 48 | 28 |
| Yes | 70   | 53  | 34  | 18  | 11  | 9   | 8   | 6  | 3  | 1  |

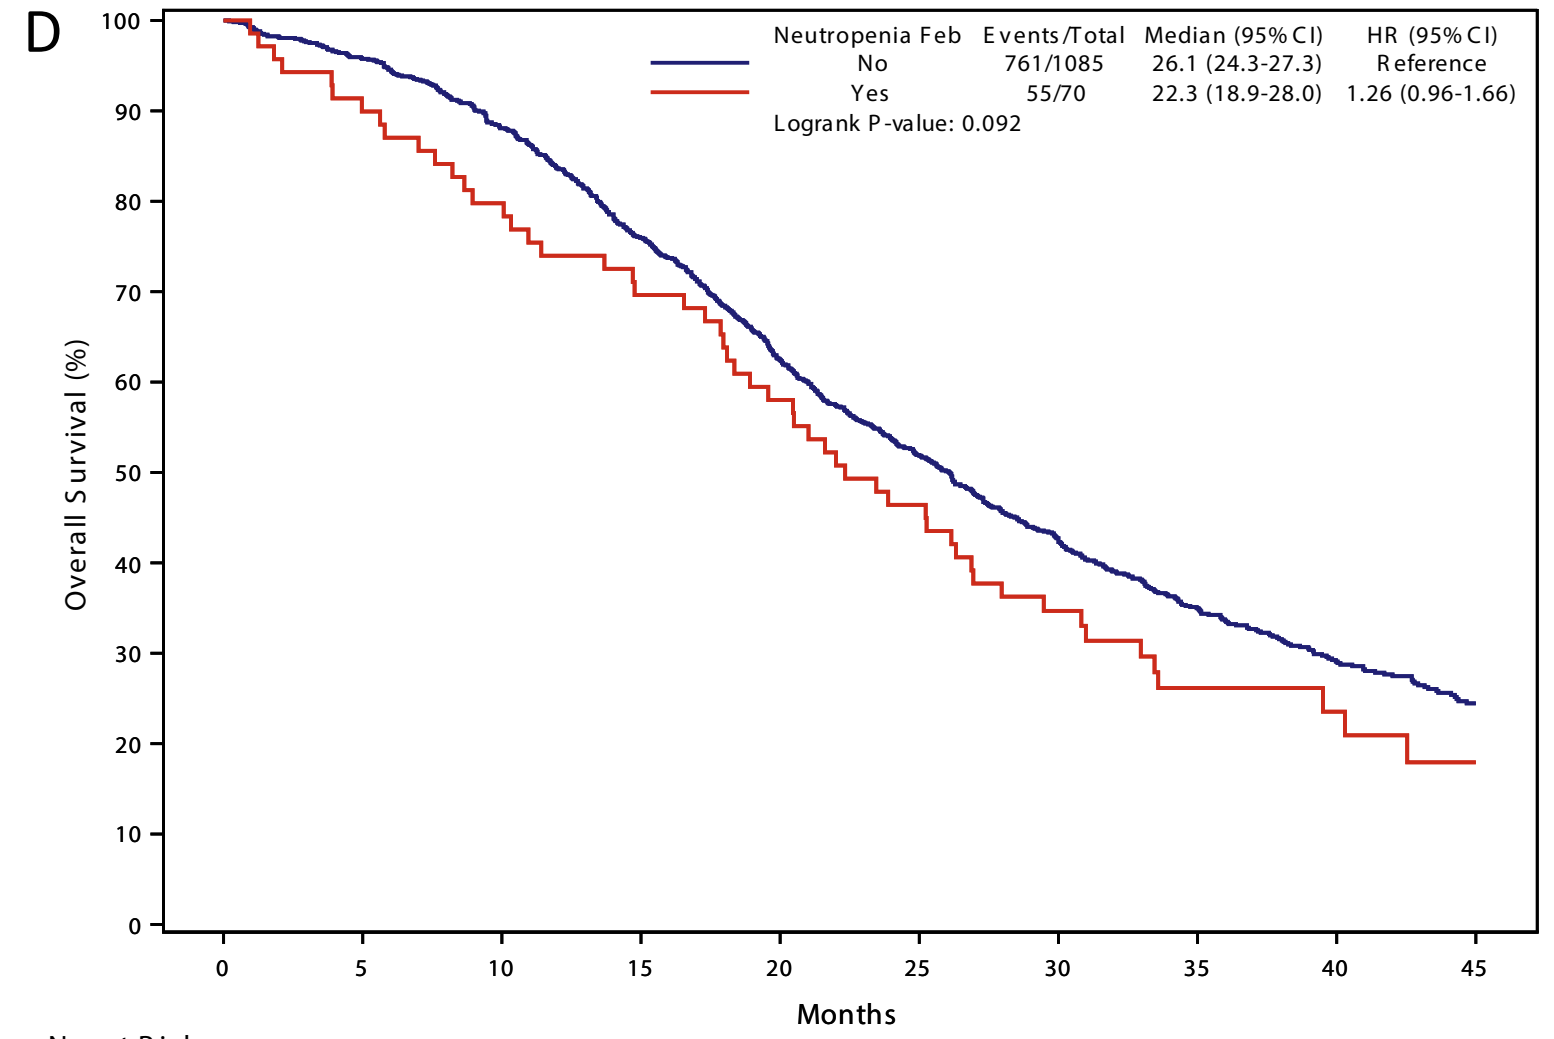

No. at Risk

|     |      |      |     |     |     |     |     |     |     |     |
|-----|------|------|-----|-----|-----|-----|-----|-----|-----|-----|
| No  | 1085 | 1036 | 952 | 820 | 672 | 551 | 403 | 287 | 172 | 101 |
| Yes | 70   | 62   | 55  | 48  | 40  | 32  | 22  | 14  | 9   | 6   |
